# Supplementary material
Source: publisher figshare collection journal article supplement (https://frontiersin.figshare.com/ndownloader/files/18558305)
Supplement: Supplementary file 1 [file 18558305]

Supplementary Material

**Tab. S2. *D. cornigera* occurrences from ROV video analysis.** Table showing the location, latitude and longitude, depth and number of colonies of *D. cornigera* sites extracted from ROV video analysis.

| **Location** | **Area** | **ROV** | **Site** | **Latitude** | **Longitude** | **Depth (m)** | ***D. cornigera* colonies** |
| --- | --- | --- | --- | --- | --- | --- | --- |
| Adriatic Sea | Bari Canyon | A207 | A207_1 | 41° 17' 16" N | 17° 16' 37" E | 443 | 1 |
| Adriatic Sea | Bari Canyon | A210 | A210_1 | 41° 17' 18" N | 17° 17' 09" E | 510 | 1 |
| Adriatic Sea | Bari Canyon | A51 | A51_1 | 41° 17' 15" N | 17° 16' 36" E | 418 | 2 |
| Adriatic Sea | Bari Canyon | SIRIAD04 | SIRIAD04_1 | 41° 17' 15" N | 18° 40' 26" E | 420 | 1 |
| Adriatic Sea | Bari Canyon | MS1522 | MS1522_1 | 41° 19' 03" N | 18° 36' 20" E | 272 | 1 |
| Adriatic Sea | Monopoli | MS17_179 | MS17_179_1 | 41° 04' 50" N | 18° 36' 33" E | 494 | 2 |
| Adriatic Sea | Monopoli | MS17_179 | MS17_179_2 | 41° 04' 50" N | 18° 36' 34" E | 494 | 4 |
| Adriatic Sea | Monopoli | MS17_179 | MS17_179_3 | 41° 04' 49" N | 17° 04' 59" E | 490 | 4 |
| Adriatic Sea | Monopoli | MS17_179 | MS17_179_4 | 41° 04' 49" N | 18° 12' 01" E | 491 | 1 |
| Adriatic Sea | Monopoli | MS17_179 | MS17_179_5 | 41° 04' 45" N | 18° 11' 56" E | 463 | 1 |
| Adriatic Sea | Off Montenegro | A63 | A63_1 | 41° 38' 53" N | 18° 11' 56" E | 455 | 1 |
| Adriatic Sea | Off Montenegro | A68 | A68_1 | 41° 41' 04" N | 18° 12' 02" E | 504 | 1 |
| Adriatic Sea | Off Montenegro | ALTRO44 | ALTRO44_1 | 41° 40' 44" N | 16° 48' 07" E | 433 | 1 |
| Adriatic Sea | Off Montenegro | ALTRO44 | ALTRO44_2 | 41° 40' 44" N | 16° 48' 12" E | 436 | 1 |
| Ionian Sea | Amendolara Seamount | MS17_092 | MS17_092_1 | 39° 49' 49" N | 16° 48' 13" E | 199 | 8 |
| Ionian Sea | Amendolara Seamount | MS17_092 | MS17_092_2 | 39° 49' 48" N | 16° 48' 13" E | 200 | 1 |
| Ionian Sea | Amendolara Seamount | MS17_092 | MS17_092_3 | 39° 49' 49" N | 16° 48' 14" E | 200 | 1 |
| Ionian Sea | Amendolara Seamount | MS17_092 | MS17_092_4 | 39° 49' 49" N | 16° 48' 15" E | 199 | 2 |
| Ionian Sea | Amendolara Seamount | MS17_092 | MS17_092_5 | 39° 49' 50" N | 16° 48' 15" E | 199 | 1 |
| Ionian Sea | Amendolara Seamount | MS17_092 | MS17_092_6 | 39° 49' 52" N | 16° 48' 16" E | 199 | 1 |
| Ionian Sea | Amendolara Seamount | MS17_092 | MS17_092_7 | 39° 49' 53" N | 16° 48' 16" E | 197 | 1 |
| Ionian Sea | Amendolara Seamount | MS17_092 | MS17_092_8 | 39° 49' 53" N | 16° 48' 16" E | 199 | 1 |
| Ionian Sea | Amendolara Seamount | MS17_092 | MS17_092_9 | 39° 49' 54" N | 16° 48' 17" E | 203 | 2 |
| Ionian Sea | Amendolara Seamount | MS17_092 | MS17_092_10 | 39° 49' 55" N | 16° 48' 07" E | 204 | 1 |
| Ionian Sea | Amendolara Seamount | MS17_092 | MS17_092_11 | 39° 49' 55" N | 16° 48' 17" E | 204 | 3 |
| Ionian Sea | Amendolara Seamount | MS17_092 | MS17_092_12 | 39° 49' 56" N | 16° 48' 17" E | 205 | 1 |
| Ionian Sea | Amendolara Seamount | MS17_092 | MS17_092_13 | 39° 49' 56" N | 16° 48' 18" E | 205 | 1 |
| Ionian Sea | Amendolara Seamount | MS17_092 | MS17_092_14 | 39° 49' 57" N | 16° 48' 18" E | 205 | 1 |
| Ionian Sea | Amendolara Seamount | MS17_092 | MS17_092_15 | 39° 49' 58" N | 16° 48' 19" E | 199 | 1 |
| Ionian Sea | Amendolara Seamount | MS17_092 | MS17_092_16 | 39° 49' 59" N | 16° 48' 19" E | 199 | 6 |
| Ionian Sea | Amendolara Seamount | MS17_092 | MS17_092_17 | 39° 49' 59" N | 16° 48' 08" E | 198 | 1 |
| Ionian Sea | Amendolara Seamount | MS17_092 | MS17_092_18 | 39° 49' 60" N | 16° 48' 08" E | 197 | 2 |
| Ionian Sea | Amendolara Seamount | MS17_092 | MS17_092_19 | 39° 50' 00" N | 16° 48' 08" E | 197 | 1 |
| Ionian Sea | Amendolara Seamount | MS17_092 | MS17_092_20 | 39° 50' 01" N | 16° 48' 10" E | 198 | 1 |
| Ionian Sea | Amendolara Seamount | MS17_092 | MS17_092_21 | 39° 50' 01" N | 16° 48' 11" E | 195 | 1 |
| Ionian Sea | Amendolara Seamount | MS17_092 | MS17_092_22 | 39° 50' 01" N | 16° 48' 11" E | 193 | 2 |
| Ionian Sea | Amendolara Seamount | MS17_092 | MS17_092_23 | 39° 50' 02" N | 16° 48' 11" E | 186 | 1 |
| Ionian Sea | Amendolara Seamount | MS17_092 | MS17_092_24 | 39° 50' 02" N | 16° 47' 47" E | 186 | 2 |
| Ionian Sea | Amendolara Seamount | MS17_092 | MS17_092_25 | 39° 50' 03" N | 16° 47' 28" E | 181 | 5 |
| Ionian Sea | Amendolara Seamount | MS17_093 | MS17_093_1 | 39° 50' 50" N | 16° 47' 43" E | 172 | 1 |
| Ionian Sea | Amendolara Seamount | MS17_093 | MS17_093_2 | 39° 50' 52" N | 16° 47' 41" E | 162 | 4 |
| Ionian Sea | Amendolara Seamount | MS17_093 | MS17_093_3 | 39° 50' 53" N | 16° 47' 39" E | 167 | 1 |
| Ionian Sea | Amendolara Seamount | MS17_093 | MS17_093_4 | 39° 50' 54" N | 16° 47' 38" E | 167 | 1 |
| Ionian Sea | Amendolara Seamount | MS17_093 | MS17_093_5 | 39° 50' 54" N | 16° 47' 38" E | 167 | 2 |
| Ionian Sea | Amendolara Seamount | MS17_093 | MS17_093_6 | 39° 50' 54" N | 16° 47' 37" E | 166 | 3 |
| Ionian Sea | Amendolara Seamount | MS17_093 | MS17_093_7 | 39° 50' 54" N | 16° 47' 29" E | 163 | 3 |
| Ionian Sea | Amendolara Seamount | MS17_093 | MS17_093_8 | 39° 50' 57" N | 16° 47' 29" E | 137 | 1 |
| Ionian Sea | Amendolara Seamount | MS17_093 | MS17_093_9 | 39° 50' 57" N | 18° 22' 14" E | 133 | 1 |
| Ionian Sea | Amendolara Seamount | MS17_093 | MS17_093_10 | 39° 50' 57" N | 18° 22' 12" E | 138 | 2 |
| Ionian Sea | Santa Maria di Leuca | MS16_095 | MS16_095_1 | 39° 34' 48" N | 18° 21' 30" E | 498 | 6 |
| Ionian Sea | Santa Maria di Leuca | MS16_100 | MS16_100_1 | 39° 35' 01" N | 17° 34' 41" E | 482 | 2 |
| Ionian Sea | Santa Maria di Leuca | MS16_100 | MS16_100_2 | 39° 35' 01" N | 17° 34' 41" E | 482 | 2 |
| Ionian Sea | Santa Maria di Leuca | MS16_100 | MS16_100_3 | 39° 34' 54" N | 17° 34' 41" E | 486 | 3 |
| Ionian Sea | Santa Maria di Leuca | MS17_115 | MS17_115_1 | 39° 44' 04" N | 17° 34' 40" E | 128 | 1 |
| Ionian Sea | Santa Maria di Leuca | MS17_115 | MS17_115_2 | 39° 44' 06" N | 17° 34' 36" E | 119 | 1 |
| Ionian Sea | Santa Maria di Leuca | MS17_117 | MS17_117_1 | 39° 42' 24" N | 08° 54' 43" E | 123 | 1 |
| Tyrrhenian Sea | Nora Canyon | RECORD22 | RECORD22_1 | 38° 42' 09" N | 08° 54' 44" E | 463 | 1 |
| Tyrrhenian Sea | Nora Canyon | RECORD22 | RECORD22_2 | 38° 42' 09" N | 08° 54' 44" E | 458 | 7 |
| Tyrrhenian Sea | Nora Canyon | RECORD22 | RECORD22_3 | 38° 42' 09" N | 08° 54' 44" E | 454 | 1 |
| Tyrrhenian Sea | Nora Canyon | RECORD22 | RECORD22_4 | 38° 42' 10" N | 08° 54' 45" E | 453 | 1 |
| Tyrrhenian Sea | Nora Canyon | RECORD22 | RECORD22_5 | 38° 42' 11" N | 17° 16' 39" E | 441 | 1 |
